# Supplementary material for: Two-step synthesis of boron and nitrogen co-doped graphene as a synergistically enhanced catalyst for the oxygen reduction reaction
Source: Royal Society of Chemistry journal article supplement (doi:10.1039/c4ra10162f), 2014-01-01
Supplement: c4ra10162f1.pdf [file c4ra10162f1.pdf]

Electronic Supplementary Information (ESI) for

## **Two-step synthesis of boron and nitrogen co-doped graphene as synergistically enhanced catalyst for oxygen reduction reaction**

Jiapo Tai<sup>†</sup>, Jiantong Hu<sup>†</sup>, Zhongxin Chen and Hongbin Lu\*

State Key Laboratory of Molecular Engineering of Polymers, and Department of Macromolecular Science, Fudan University, 220 Handan Road, Shanghai, 200433, China. Tel/Fax: 86-21-5566 4589. To whom correspondence should be addressed: [hongbinlu@fudan.edu.cn](mailto:hongbinlu@fudan.edu.cn).

### **This PDF includes:**

1. O<sub>1s</sub> XPS and C<sub>1s</sub> XPS of NG and BNG;
  2. A comparison between peaks designation in XPS N<sub>1s</sub> and B<sub>1s</sub> spectra;
  3. TGA results of NG and BNG;
  4. CV curves of commercial Pt/C catalyst in O<sub>2</sub>/N<sub>2</sub>-saturated 0.1 mol L<sup>-1</sup> KOH;
  5. A comparison of our BNG and other reported metal-free ORR catalysts;
  6. K-L curve with reference plots for 2e<sup>-</sup> and 4e<sup>-</sup> pathways
-

## 1. O<sub>1s</sub> XPS and C<sub>1s</sub> XPS of NG and BNG:

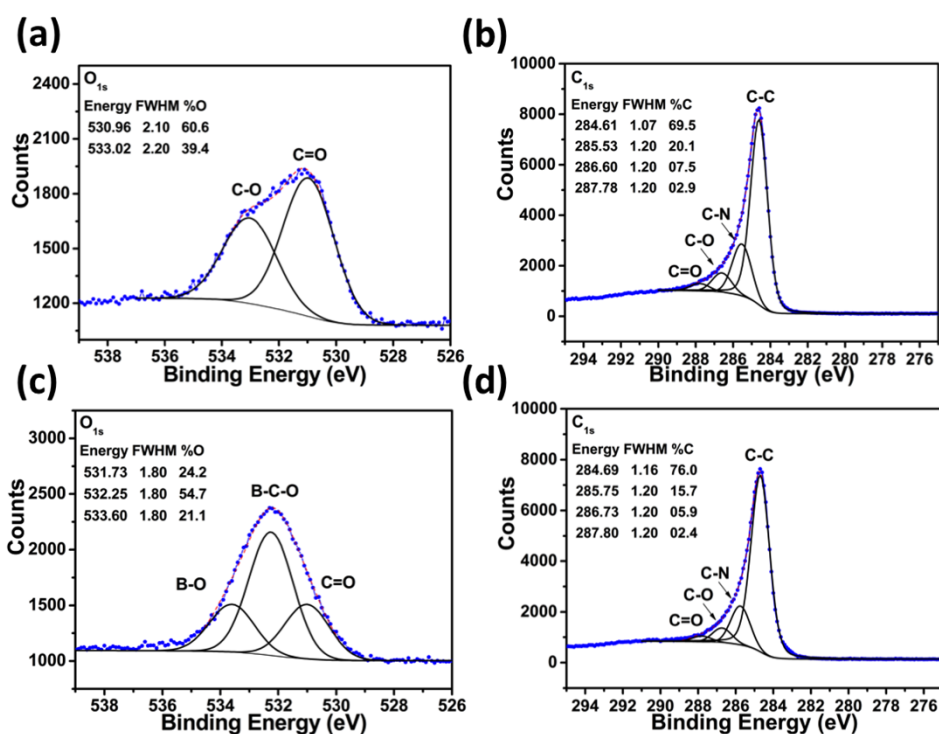

Fig. S1 (a) XPS-O<sub>1s</sub> and (b) XPS-C<sub>1s</sub> of NG; (c) XPS-O<sub>1s</sub> and (d) XPS-C<sub>1s</sub> of BNG

## 2. A comparison between peaks designation in N<sub>1s</sub> and B<sub>1s</sub> spectra:

### XPS Measurements and Data Analysis:

X-ray photoelectron spectra (XPS) were carried out on a PHI Quantera SXM<sup>TM</sup> scanning X-ray Microprobe<sup>TM</sup> with monochromatic Al K<sub>α</sub> radiation ( $h\nu = 1486.6$  eV). The deconvolution of peaks was conducted using the XPS Peak processing software version 4.1 (Chemistry, CUHK), along with a Shirley background subtraction, a Gaussian sum function, and an iterative least-squares optimization algorithm. Before fitting, all binding energies were corrected according to the C<sub>1s</sub> hydrocarbon peak at 284.8 eV. The position and full width half maximum (FWHM) of peaks in Figure 2 & S1 were determined on the basis of the results reported in literature and the spectrometer condition we used. The total fitting error is found to be smaller than 10 %.

### Peak Designations of N<sub>1s</sub> spectra in the literature:

**Table S1** A comparison of peaks designation in N1s spectra for N-doped or B, N co-doped graphene

| <b>N<sub>1s</sub> spectrum</b> | <b>I</b>                                                                                                                                           | <b>II</b>              | <b>III</b> | <b>IV</b>       |
|--------------------------------|----------------------------------------------------------------------------------------------------------------------------------------------------|------------------------|------------|-----------------|
| Moieties                       | Pyridinic                                                                                                                                          | Pyrrolic               | Graphitic  | --              |
| Binding Energy                 | 398.7                                                                                                                                              | 400.1                  | 401.7      | --              |
| Reference                      | L. Fang, Y. Chen and L. Chen, <i>ACS Nano</i> , 2011, <b>5</b> , 9611-9618                                                                         |                        |            |                 |
| Moieties                       | Pyridinic                                                                                                                                          | Pyrrolic               | Graphitic  | Pyridinic Oxide |
| Binding Energy                 | 399.0                                                                                                                                              | 400.3                  | 401.1      | 402.8           |
| Reference                      | Y. Shao, S. Zhang, M. H. Engelhard, G. Li, G. Shao, Y. Wang, J. Liu, I. A. Aksay and Y. Lin, <i>J. Mater. Chem.</i> , 2010, <b>20</b> , 7491-7496. |                        |            |                 |
| Moieties                       | Pyridinic                                                                                                                                          | Pyrrolic               | Graphitic  | --              |
| Binding Energy                 | 398.6                                                                                                                                              | 399.8                  | 401.0      | --              |
| Reference                      | G. Ma, R. Jia, J. Zhao, Z. Wang, C. Song, S. Jia and Z. Zhu, <i>J. Phys. Chem. C</i> , 2011, <b>115</b> , 25148–25154                              |                        |            |                 |
| Moieties                       | Pyridinic                                                                                                                                          | Pyrrolic               | Graphitic  | --              |
| Binding Energy                 | 398.5                                                                                                                                              | 400                    | 401.5      | --              |
| Reference                      | C. V. Rao and Y. Ishikawa, <i>J. Phys. Chem. C</i> , 2012, <b>116</b> , 4340–4346                                                                  |                        |            |                 |
| Moieties                       | Pyridinic                                                                                                                                          | Pyrrolic               | Graphitic  | Pyridinic Oxide |
| Binding Energy                 | 398.7                                                                                                                                              | 400.3                  | 401.4      | 402 ~ 405       |
| Reference                      | D. Long, W. Li, L. Ling, J. Miyawaki, I. Mochida and S. H. Yoon, <i>Langmuir</i> , 2010, <b>26</b> , 16096–16102                                   |                        |            |                 |
| Moieties                       | Pyridinic                                                                                                                                          | Pyrrolic               | Graphitic  | Pyridinic Oxide |
| Binding Energy                 | 398.5                                                                                                                                              | 399.8                  | 401.3      | 403.6           |
| Reference                      | S. Li, Y. Hu, Q. Xu, J. Sun, B. Hou and Y. Zhang, <i>J. Power Sources</i> , 2012, <b>213</b> , 265-269                                             |                        |            |                 |
| Moieties                       | Pyridinic                                                                                                                                          | Pyrrolic and Graphitic |            | Pyridinic Oxide |
| Binding Energy                 | 398.6                                                                                                                                              | 400 ~ 402              |            | 402 ~ 404       |
| Reference                      | C. H. Choi, S. H. Park and S. I. Woo, <i>ACS Nano</i> , 2012, <b>6</b> , 7084–7091                                                                 |                        |            |                 |
| Moieties                       | Pyridinic                                                                                                                                          | Pyrrolic               | Graphitic  | --              |
| Binding Energy                 | 398.0                                                                                                                                              | 400.0                  | 401.3      | --              |
| Reference                      | H. Wang, X. Bo, C. Luhana and L. Guo, <i>Electrochem. Commun.</i> , 2012, <b>21</b> , 5-8                                                          |                        |            |                 |
| Moieties                       | Pyridinic                                                                                                                                          | Pyrrolic               | Graphitic  | Pyridinic Oxide |
| Binding Energy                 | 398.2                                                                                                                                              | 399.5                  | 401.1      | 402.6           |
| Reference                      | Z. H. Sheng, L. Shao, J. J. Chen, W. J. Bao, F. B. Wang and X. H. Xia, <i>ACS Nano</i> , 2011, <b>5</b> , 4350-4358.                               |                        |            |                 |
| Moieties                       | Pyridinic                                                                                                                                          | Pyrrolic               | Graphitic  | N-Oxide         |
| Binding Energy                 | 397.95                                                                                                                                             | 398.76                 | 401.05     | 405.30          |
| Reference                      | U. B. Nasini, V. G. Bairi, S. K., Ramasahayam, S. E. Bourdo, T. Viswanathan and A. U. Shaikh, <i>ChemElectroChem</i> , 2014, <b>1</b> , 573–579    |                        |            |                 |

|                |                                                                                                                       |           |           |                           |
|----------------|-----------------------------------------------------------------------------------------------------------------------|-----------|-----------|---------------------------|
| Moieties       | Pyridinic                                                                                                             | Amine     | Pyrrolic  | Protonated N or Graphitic |
| Binding Energy | 398.6                                                                                                                 | 399.4     | 400.1     | 401.4                     |
| Reference      | P. Chen, T. Y. Xiao, Y. H. Qian, S. S. Li and S. H. Yu, <i>Adv. Mater.</i> , 2013, 25, 3192-3196.                     |           |           |                           |
| Moieties       | BN                                                                                                                    | Pyridinic | Graphitic | Pyridinic Oxide           |
| Binding Energy | 397.9                                                                                                                 | 398.6     | 400.9     | 403.0                     |
| Reference      | C. H. Choi, M. W. Chung, H. C. Kwon, S. H. Park and S. I. Woo, <i>J. Mater. Chem. A</i> , 2013, 1, 3694–3699          |           |           |                           |
| Moieties       | Pyridinic                                                                                                             | Pyrrolic  | Graphitic | Pyridinic Oxide           |
| Binding Energy | 398.1                                                                                                                 | 399.6     | 401.2     | 403.0                     |
| Reference      | Z. Lin, M. Song, Y. Ding, Y. Liu, M. Liu and C. Wong, <i>Phys. Chem. Chem. Phys.</i> , 2012, 14, 3381–3387            |           |           |                           |
| Moieties       | Pyridinic                                                                                                             | Pyrrolic  | Graphitic | N-Oxide                   |
| Binding Energy | 398.7                                                                                                                 | 400.1     | 401.7     | > 402                     |
| Reference      | J. Wu, D. Zhang, Y. Wang, B. Hou, <i>J. Power Sources</i> , 2013, 227, 185-190                                        |           |           |                           |
| Moieties       | Pyridinic                                                                                                             | --        | Graphitic | Pyridinic Oxide           |
| Binding Energy | 398.5                                                                                                                 | --        | 401.0     | 402.4                     |
| Reference      | W. Wei, H. Liang, K. Parvez, X. Zhuang, X. Feng and K. Müllen, <i>Angew. Chem. Int. Edit.</i> , 2014, 126, 1596–1600. |           |           |                           |
| Moieties       | Pyridinic                                                                                                             | Pyrrolic  | Graphitic | --                        |
| Binding Energy | 398.4                                                                                                                 | 399.8     | 401.7     | --                        |
| Reference      | This manuscript                                                                                                       |           |           |                           |

### Peak Designations of B<sub>s</sub> spectra in the literature:

**Table S2** A comparison of peaks designation in B<sub>1s</sub> spectra for B, N co-doped graphene

| B <sub>1s</sub> spectrum | I                                                                                                                                        | II                     | III                               | IV       |
|--------------------------|------------------------------------------------------------------------------------------------------------------------------------------|------------------------|-----------------------------------|----------|
| Moieties                 | BN <sub>2</sub> C/BC <sub>3</sub>                                                                                                        | BC <sub>2</sub> O/h-BN | BN <sub>3</sub> /BCO <sub>2</sub> | B-O      |
| Binding Energy           | 189.5 eV                                                                                                                                 | 190.6 eV               | 192 eV                            | 193 eV   |
| Reference                | J.-i. Ozaki, N. Kimura, T. Anahara and A. Oya, <i>Carbon</i> , 2007, 45, 1847-1853.                                                      |                        |                                   |          |
| Moieties                 | --                                                                                                                                       | BC <sub>2</sub> O      | BCO <sub>2</sub>                  | B-O      |
| Binding Energy           | --                                                                                                                                       | 190.8 eV               | 191.5 eV                          | 192.7 eV |
| Reference                | J. Zhu, C. He, Y. Li, S. Kang and P. K. Shen, <i>J. Mater. Chem. A</i> , 2013, 1, 14700-14705.                                           |                        |                                   |          |
| Moieties                 | B-C                                                                                                                                      | --                     | B-N                               | B-O      |
| Binding Energy           | 189 eV                                                                                                                                   | --                     | 191 eV                            | 192 eV   |
| Reference                | Y. Xue, D. Yu, L. Dai, R. Wang, D. Li, A. Roy, F. Lu, H. Chen, Y. Liu and J. Qu, <i>Phys. Chem. Chem. Phys.</i> , 2013, 15, 12220-12226. |                        |                                   |          |

|                |                 |                                    |    |          |
|----------------|-----------------|------------------------------------|----|----------|
| Moieties       | BC <sub>3</sub> | BC <sub>2</sub> O/BCO <sub>2</sub> | -- | B-O      |
| Binding Energy | 190 eV          | 191.2 eV                           | -- | 192.7 eV |
| Reference      | This manuscript |                                    |    |          |

### 3. TGA results of NG and BNG:

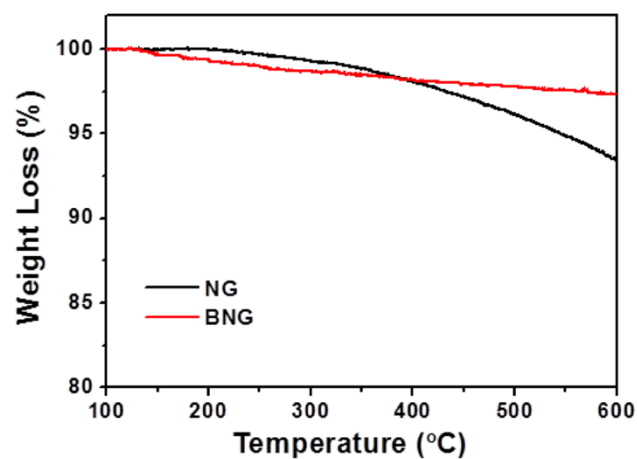

**Fig. S2** TGA curves of NG and BNG (both samples were tested in nitrogen atmosphere, with the heating rate of 20 °C min<sup>-1</sup>)

### 4. CV curves of commercial Pt/C catalyst in 0.1 mol L<sup>-1</sup> KOH:

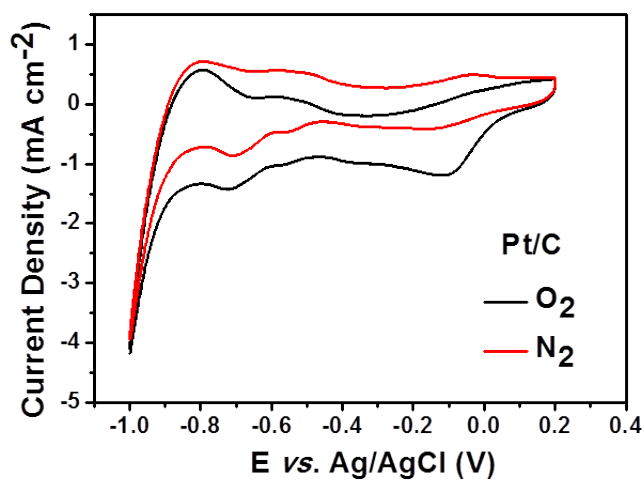

**Fig. S3** CV curves of commercial Pt/C catalyst in O<sub>2</sub>/N<sub>2</sub> saturated 0.1 mol L<sup>-1</sup> KOH solution (scanning rate = 100 mV s<sup>-1</sup>)

## 5. A comparison of some metal-free ORR catalysts reported in literature:

**Table S3** A comparison of the major performances of some metal-free ORR catalysts reported in literature (all the electrocatalytic characterization were conducted in 0.1 mol L<sup>-1</sup> KOH solution;

| Items                 | Doping Levels                 | Catalyst Loading (mg cm <sup>-2</sup> ) | Onset Potential (V vs. Ag/AgCl) | Current density at -0.8V (mA cm <sup>-2</sup> ) | Ref.       |
|-----------------------|-------------------------------|-----------------------------------------|---------------------------------|-------------------------------------------------|------------|
| N-doped graphene      | N: 6.2 at.%                   | 0.08                                    | -0.3                            | 3.6 (1200 rpm)                                  | 1          |
| N-doped graphene      | N: 7.25 at.%                  | 0.14                                    | -0.2                            | 3.2 (1200 rpm)                                  | 2          |
| N-doped graphene      | N: 5 at.%                     | 0.1                                     | -0.2                            | 4.5 (1900 rpm)                                  | 3          |
| B-doped graphene      | B: 3 at.%                     | Not mentioned                           | -0.12                           | 5 (1600 rpm)                                    | 4          |
| B,N co-doped graphene | N: 4.42 at.%,<br>B: 2.17 at.% | 0.28                                    | -0.16                           | 5.2 (1500 rpm)                                  | 5          |
| B,N co-doped graphene | N: 4.5 at.%,<br>B: 3 at.%     | Not mentioned                           | -0.16                           | 5.5 (1600 rpm)                                  | 6          |
| B,N co-doped graphene | N: 11 at.%,<br>B: 12 at.%     | 0.01 mg on the electrode                | Not mentioned                   | 5.1 (Rate not mentioned)                        | 7          |
| B,N co-doped graphene | N: 6.8 at.%,<br>B: 4.8 at.%   | 0.1                                     | -0.17                           | 5.5 (1600 rpm)                                  | This study |

the data in the table were calculated from the RDE test).

## 6. K-L curve with reference plots for 2e<sup>-</sup> and 4e<sup>-</sup> pathways:

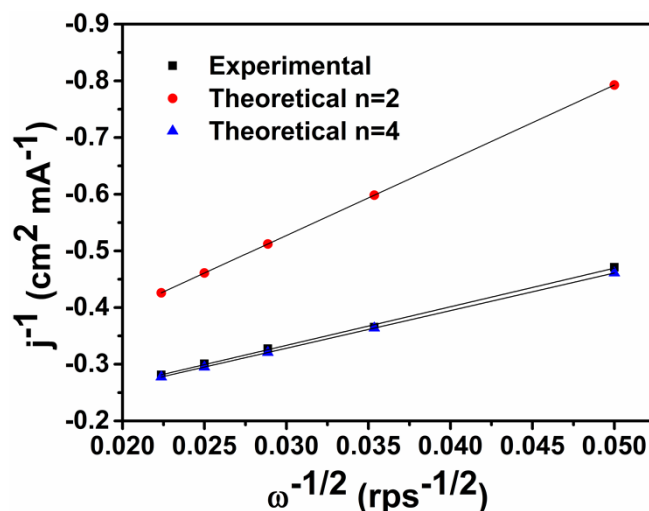

**Fig. S4** Koutecky-Levich curve fitted from the data of RDE test. (potential = -0.4 V)

## References:

- 1 Z. Lin, G. Waller, Y. Liu, M. Liu and C.-P. Wong, *Adv. Energy Mater.*, 2012, **2**, 884-888.
- 2 J. Wu, D. Zhang, Y. Wang and B. Hou, *J. Power Sources*, 2013, **227**, 185-190.
- 3 M. Vikkisk, I. Kruusenberg, U. Joost, E. Shulga, I. Kink and K. Tammeveski, *Appl. Catal., B*, 2014, **147**, 369-376.
- 4 Z. Zuo, Z. Jiang and A. Manthiram, *J. Mater. Chem. A*, 2013, **1**, 13476-13483.
- 5 Y. Zheng, Y. Jiao, L. Ge, M. Jaroniec and S. Z. Qiao, *Angew. Chem., Int. Ed.*, 2013, **52**, 3110-3116.
- 6 Y. Xue, D. Yu, L. Dai, R. Wang, D. Li, A. Roy, F. Lu, H. Chen, Y. Liu and J. Qu, *Phys. Chem. Chem. Phys.*, 2013, **15**, 12220-12226.
- 7 S. Wang, L. Zhang, Z. Xia, A. Roy, D. W. Chang, J.-B. Baek and L. Dai, *Angew. Chem., Int. Ed.*, 2012, **51**, 4209-4212.
